# Supplementary material
Source: PubMed Central journal article supplement (PMC4988495)
Supplement: NIHMS69013-supplement-Table_S1.pdf [file NIHMS69013-supplement-Table_S1.pdf]

**Table S1.** Table of purchased compounds after the selection with *in silico* techniques

| Compound    | Vendor ID    | Chemical structure                                                                   |
|-------------|--------------|--------------------------------------------------------------------------------------|
| 1           | BAS 00380378 | 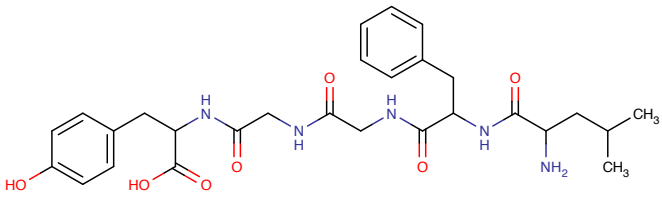   |
| 2           | BAS 01157415 |    |
| 3           | BAS 01813935 |   |
| 4           | BAS 01861551 |  |
| 5 (BCI-121) | BAS 04914128 |  |
| 6           | LEG 13303958 |  |
| 7           | LEG 15446752 |  |

|    |              |                                                                                      |
|----|--------------|--------------------------------------------------------------------------------------|
| 8  | SYN 13974930 | 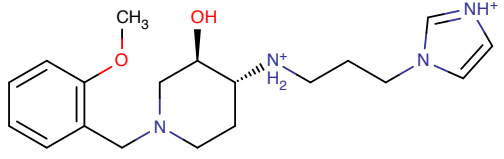   |
| 9  | SYN 13975176 |    |
| 10 | SYN 13975264 |    |
| 11 | SYN 19971900 |   |
| 12 | SYN 19990719 |  |
| 13 | SYN 20062175 |  |
| 14 | SYN 22884953 |  |
| 15 | SYN 13973760 |  |
